# Supplementary material for: Meta-analysis on the prevalence of Mycoplasmosis in poultry of India and the World
Source: Research Square preprint supplement (doi:10.21203/rs.3.rs-761019/v1), 2021-08-02
Supplement: Supplementary file 1 [file c7a52de70f6c08fce2636263.docx]

**Supplementary Table 2. List of studies from World included in meta-analysis**

| **S. No** | **Study (Author and Year)** | **Country** | **MG, MS** |
| --- | --- | --- | --- |
| 1 | Aimeur et al., 2010 | Algeria | MG, MS |
| 2 | Hossain et al., 2010 | Bangladesh | MG |
| 3 | Xavier et al., 2011 | Argentina | MG, MS |
| 4 | Haghighi-Khoshkhoo et al., 2011 | Iran | MG, MS |
| 5 | Gole et al., 2012 | Australia | MS |
| 6 | Heleili et al., 2012 | Algeria | MG, MS |
| 7 | Nouzha et al., 2013 | Algeria | MG |
| 8 | Madsen et al., 2013 | Maryland | MG |
| 9 | Rauf et al., 2013 | Pakistan | MG |
| 10 | Khalifa et al., 2013 | Sudan | MG |
| 11 | Sun et al., 2014 | China | MG |
| 12 | Islam et al., 2014 | Bangladesh | MG |
| 13 | Yasmin et al., 2014 | Malaysia | MG |
| 14 | Haesendonck et al., 2014 | Europe | MG, MS |
| 15 | Haesendonck et al., 2014 | Europe | MG, MS |
| 16 | Ali et al., 2015 | Bangladesh | MG |
| 17 | Silva et al., 2015 | Brazil | MG, MS |
| 18 | Zhang et al., 2015 | China | MG |
| 19 | Ahmed et al., 2015 | Nigeria | MG, MS |
| 20 | Michiels et al., 2016 | Belgium | MG, MS |
| 21 | Hossam et al., 2016 | Egypt | MG |
| 22 | Ghaniei et al., 2016 | Iran | MS |
| 23 | Kammon et al., 2017 | Libya | MG, MS |
| 24 | Hutton et al., 2017 | Ethiopia | MG, MS |
| 25 | Xue et al., 2017 | China | MS |
| 26 | Hong et al., 2018 | China | MG, MS |
| 27 | Abbas et al., 2018 | Pakistan | MG |
| 28 | Ayim-Akonor et al., 2018 | Ghana | MG |
| 29 | Rasool et al., 2018 | Pakistan | MS |
| 30 | Ghadimipour et al., 2018 | Iran | MG, MS |
| 31 | Derksen et al., 2018 | United States | MG, MS |
| 32 | Amer et al., 2019 | Egypt | MG, MS |
| 33 | Fujisawa et al., 2019 | Myanmar | MG, MS |
| 34 | Kursa et al., 2019 | Poland | MS |
| 35 | Marouf et al., 2020 | Egypt | MG, MS |
| 36 | Shoaib et al., 2020 | Pakistan | MG, MS |
